# Supplementary material for: Regulation of Carotenoid Biosynthesis and Degradation in Lettuce (Lactuca sativa L.) from Seedlings to Harvest
Source: MDPI journal article supplement (doi:10.3390/ijms241210310), 2023-06-18
Supplement: s1 [file s1]

## **Supplementary material**

### **Regulation of carotenoid biosynthesis and degradation in lettuce (*Lactuca sativa* L.) from seedlings to harvest**

Galina Brychkova<sup>1\*</sup>, Cleiton Lourenço de Oliveira<sup>1,2</sup>, Luiz Antonio Augusto Gomes<sup>3</sup>, Matheus de Souza Gomes<sup>4</sup>, Antoine Fort<sup>1,5</sup>, Alberto Abrantes Esteves-Ferreira<sup>6</sup>, Ronan Sulpice<sup>6</sup>, Peter McKeown<sup>1</sup>, [Charles Spillane](#)<sup>1\*</sup>

## **Supplementary Tables**

**Supplementary Table S1.** Primers sequences (designed by Quantprime) used for qRT-PCR analysis.

| Locus         | Foward primer                  | Reverse primer                | Accession number |
|---------------|--------------------------------|-------------------------------|------------------|
| <i>UBQ</i>    | 5'-CCATTTGGTCCTCCGTCTCC-3'     | 5'-CGAGGGTTCTGCCGTCTTCT-3'    | DW141651         |
| <i>DXS</i>    | 5'-CGCCATTGATGACAGACCCAG-3'    | 5'-GCCCTTCCAGCATTATTCGC-3'    | AB205044         |
| <i>DXR</i>    | 5'-AGAAACGAATCTTTGGTTGAAG-3'   | 5'-TCACACAATCAGGATGACGG-3'    | AB205045         |
| <i>IPI</i>    | 5'-TCACTTGACGGAGAAGATTGAG-3'   | 5'-CCATACCAAAGGAAATGTCACC-3'  | AB205048         |
| <i>GGPS</i>   | 5'-AATTCGGTAAATCAAGCCCTAG-3'   | 5'-ATACACAGCATCGGTCGGAC-3'    | AB205047         |
| <i>GGPPS</i>  | 5'-AACGCCACCCACAATCCATGAAG-3'  | 5'-ATGCAGAGAATGGGCCTCACAC-3'  | DY975567         |
| <i>PSY1</i>   | 5'-ACGACATCGTACACCATCTGCTC-3'  | 5'-TTCCAGGGTTGTGGTGGCTAAC-3'  | DY974614         |
| <i>PSY2</i>   | 5'-GCTTGACGCTGCTTTATCAGAC-3'   | 5'-TCTTCAGATCCATCCTCATTCC-3'  | AB205050         |
| <i>PDS</i>    | 5'-TAGCTGATGCAGGTCACAAGCC-3'   | 5'-TTCCAAGCTGCCACCTTTCCAC-3'  | DY972145         |
| <i>ZDS</i>    | 5'-ATCCACCTCATGCCCTTGATCC-3'   | 5'-TATCATAGGTGCTGGCCTTGCTG-3' | DY960874         |
| <i>CRTISO</i> | 5'-ATCTGTGATGTTGCGATTGAGC-3'   | 5'-ACGGTGGTTGGATCGGGTATC-3'   | AB205043         |
| <i>LCY-B1</i> | 5'-AGGAAGATCAGGGCCAATGAGTCC-3' | 5'-TCTTGCTGCAGAGTCAGCCAAAC-3' | DY968060         |
| <i>LCY-B2</i> | 5'-AAGGGTCTCGTGGTGGATC-3'      | 5'-TGAGGTGAAGGGTCAATCG-3'     | AB205041         |
| <i>LCY-ε</i>  | 5'-TCACACATCGTGCTAATGGATC-3'   | 5'-CCGTTGAAGATAAAGAAGACCC-3'  | AB205046         |
| <i>CHY</i>    | 5'-TAACCGGAAGGAGCGTGAAGT-3'    | 5'-TTTGCCTGCACTCCTCTTGGAC-3'  | DY970341         |
| <i>CHYβ</i>   | 5'-TCCGAACGCTTTACTTACCTTG-3'   | 5'-GAACATCTCCACCCTCCATTG-3'   | AB205042         |
| <i>VDE</i>    | 5'-ACTCGCAACAATCGTCCTGAC-3'    | 5'-GGGCACACATTTCTTTCGG-3'     | AB205051         |
| <i>ZEP</i>    | 5'-GTTGGGTATCGGGTGTCTTGG-3'    | 5'-GGCTGGTTCGTTGTGAAATGC-3'   | AB205053         |

**Supplementary Table S2.** Regression analysis of factors affecting  $\beta$ -carotene accumulation. **A.** without considering plant genotype, plant developmental stages or leaves position.

|            | $\beta$ | SE    | STD $\beta$ | t     | p    | 95.0% CI        | df    | F     | p      |
|------------|---------|-------|-------------|-------|------|-----------------|-------|-------|--------|
| (Constant) | -70.29  | 19.29 |             | -3.64 | 0.00 | -108.66, -31.93 | 4, 85 | 21.01 | <0.001 |
| Lutein     | 5.03    | 0.67  | 0.59        | 7.46  | 0.00 | 3.69, 6.37      |       |       |        |
| Chla       | 0.08    | 0.05  | 0.55        | 1.50  | 0.14 | -0.03, 0.18     |       |       |        |
| Chlb       | 0.09    | 0.05  | 0.42        | 1.67  | 0.09 | -0.02, 0.20     |       |       |        |
| ChlT       | -0.05   | 0.05  | -0.56       | -1.03 | 0.31 | -0.15, 0.05     |       |       |        |

Model's AIC: 927.87; BIC: 942.87

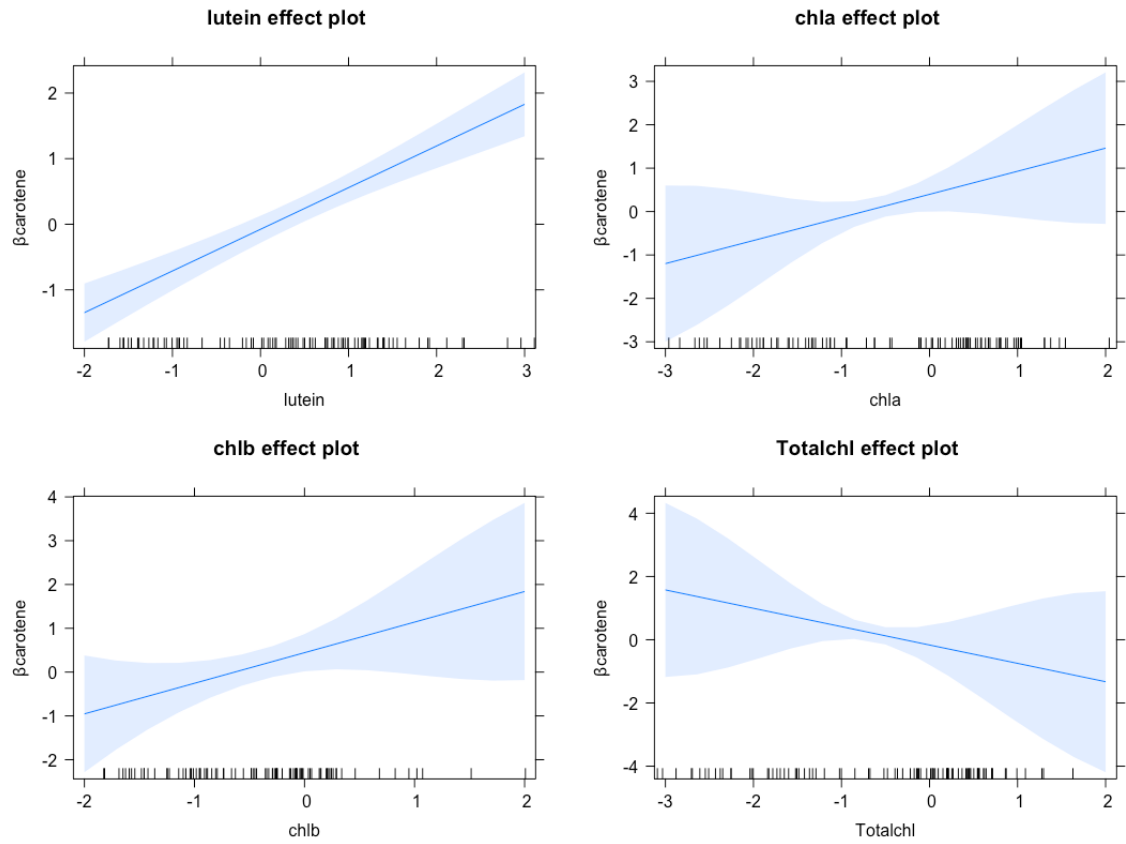

**Supplementary Table S2.** Regression analysis of factors affecting  $\beta$ -carotene accumulation **B.** accounting role of genotype, sampling time and leave position.

|                      | $\beta$ | SE    | STD $\beta$ | t     | p    | 95.0% CI        | df    | F     | p      |
|----------------------|---------|-------|-------------|-------|------|-----------------|-------|-------|--------|
| (Constant)           | -68.29  | 18.85 |             | -3.62 | 0.00 | -105.79, -30.78 | 7, 89 | 39.65 | <0.001 |
| Variety              | -4.53   | 1.93  | -0.14       | -2.34 | 0.02 | -8.37, -0.68    |       |       |        |
| Sampling time (Ts)   | -66.39  | 7.72  | -0.89       | -8.60 | 0.00 | -81.74, -51.04  |       |       |        |
| Leaves position (Lp) | 57.91   | 8.44  | 0.51        | 6.86  | 0.00 | 41.11, 74.70    |       |       |        |
| Lutein               | 10.42   | 0.84  | 1.22        | 12.40 | 0.00 | 8.74, 12.09     |       |       |        |
| Chla                 | 0.04    | 0.04  | 0.29        | 1.12  | 0.27 | -0.03, 0.11     |       |       |        |
| Chlb                 | 0.10    | 0.04  | 0.49        | 2.74  | 0.01 | 0.03, 0.18      |       |       |        |
| ChIT                 | -0.07   | 0.04  | -0.78       | -2.07 | 0.04 | -0.15, -0.01    |       |       |        |

Model's AIC: 644.06; BIC: 719.06

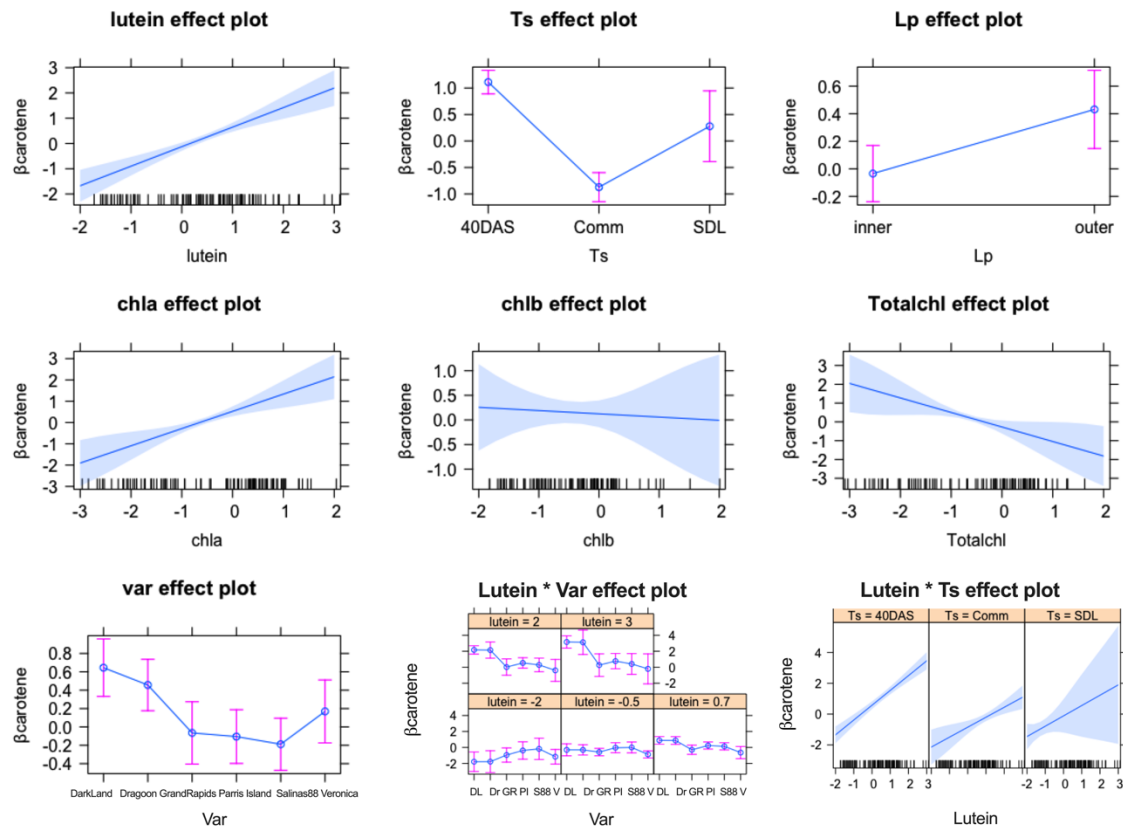

**Supplementary Table S3.** Pearson's correlation (r) comparing relative gene expression with total chlorophyll, lutein and  $\beta$ -carotene in inner and outer lettuce leaves at seedling stage, 40 days after sowing (DAS) stage and commercial size stage.

| Gene          | Comm <sup>1</sup> | Seedling |                  |                           | 40 DAS inner |       |              | 40 DAS outer |       |              | Commercial inner |       |              | Commercial outer |         |              |
|---------------|-------------------|----------|------------------|---------------------------|--------------|-------|--------------|--------------|-------|--------------|------------------|-------|--------------|------------------|---------|--------------|
|               |                   | Chl T    | Lut <sup>2</sup> | $\beta$ -car <sup>3</sup> | Chl T        | Lut   | $\beta$ -car | Chl T        | Lut   | $\beta$ -car | Chl T            | Lut   | $\beta$ -car | Chl T            | Lut     | $\beta$ -car |
| <i>DXS</i>    | Inner             | 0.56     | 0.64             | 0.41                      | 0.11         | 0.69  | 0.5          | -0.61        | 0.01  | -0.2         | -0.85            | -0.31 | -0.4         | -0.90**          | -0.44   | -0.51        |
|               | Outer             | 0.21     | 0.43             | 0.07                      | -0.1         | 0.66  | 0.29         | -0.23        | 0.12  | 0.09         | -0.35            | -0.21 | -0.08        | -0.55            | -0.37   | -0.29        |
| <i>DXR</i>    | Inner             | -0.17    | -0.4             | -0.55                     | -0.39        | -0.68 | -0.83        | -0.67        | -0.39 | -<br>0.66    | -0.26            | -0.16 | -0.4         | 0.1              | -0.19   | 0.13         |
|               | Outer             | 0.23     | -0.02            | 0.15                      | -0.06        | -0.4  | -0.22        | -0.3         | -0.1  | -0.1         | 0.6              | 0.11  | 0.45         | -0.09            | -0.14   | 0            |
| <i>IPI</i>    | Inner             | 0.63     | 0.02             | 0.17                      | -0.04        | -0.64 | -0.5         | 0.92**       | 0.65  | 0.55         | -0.23            | 0.06  | -0.12        | -0.43            | -0.68   | -0.47        |
|               | Outer             | -0.11    | -0.2             | -0.4                      | -0.04        | -0.54 | -0.33        | 0.54         | 0.61  | 0.36         | 0.51             | 0.49  | 0.73         | 0.12             | -0.46   | 0.05         |
| <i>GGPS</i>   | Inner             | -0.33    | -0.36            | -0.33                     | -0.48        | -0.87 | -0.73        | -0.48        | -0.91 | -<br>0.78    | -0.67            | -0.25 | -0.25        | -0.54            | -0.35   | -0.44        |
|               | Outer             | -0.9     | -0.36            | -0.67                     | -0.67        | -0.9  | -0.83        | -0.14        | -0.77 | -0.4         | 0.09             | -0.19 | 0.17         | -0.27            | 0.03    | 0.09         |
| <i>GGPPS</i>  | Inner             | 0.53     | 0.43             | 0.25                      | 0.37         | 0.73  | 0.69         | -0.46        | -0.18 | -<br>0.46    | -0.34            | -0.4  | -0.35        | -0.15            | -0.11   | -0.45        |
|               | Outer             | 0.92**   | 0.59             | 0.72                      | 0.71         | 0.7   | 0.79*        | 0.25         | 0.22  | 0.4          | 0.57             | -0.24 | 0.34         | -0.29            | 0       | -0.29        |
| <i>PSY1</i>   | Inner             | 0.71     | 0.72             | 0.65                      | 0.82*        | 0.85* | 0.89**       | 0.07         | -0.08 | -0.2         | 0.37             | 0.43  | 0.18         | 0.66             | 0.7     | 0.85         |
|               | Outer             | 0.92**   | 0.78*            | 0.84*                     | 0.74         | 0.77  | 0.73         | 0.61         | 0.3   | 0.57         | 0.85*            | 0.54  | 0.65         | 0.54             | 0.72    | 0.71         |
| <i>PSY2</i>   | Inner             | 0.5      | 0.34             | 0.34                      | 0.66         | 0.16  | 0.37         | -0.66        | -0.66 | -<br>0.76    | -0.28            | 0.27  | 0.29         | -0.04            | -0.4    | -0.4         |
|               | Outer             | -0.42    | 0.23             | -0.27                     | 0.15         | 0.1   | 0.03         | 0.23         | -0.43 | 0.04         | 0.33             | 0.49  | 0.73         | 0.52             | -0.1    | 0.3          |
| <i>PDS</i>    | Inner             | -0.41    | -0.72            | -0.77                     | -0.11        | -0.54 | -0.19        | -0.13        | -0.47 | -0.5         | -0.11            | -0.55 | -0.49        | 0.5              | 0.02    | -0.1         |
|               | Outer             | 0.15     | -0.4             | -0.04                     | -0.03        | -0.59 | -0.24        | 0.22         | -0.12 | 0.12         | 0.45             | -0.34 | 0.12         | 0.49             | -0.05   | -0.03        |
| <i>ZDS</i>    | Inner             | -0.1     | -0.46            | -0.47                     | -0.52        | -0.32 | -0.4         | 0            | -0.35 | -<br>0.43    | 0.05             | -0.3  | -0.14        | 0.64             | 0.41    | 0.4          |
|               | Outer             | 0.38     | -0.13            | 0.22                      | -0.43        | -0.52 | -0.54        | 0.28         | -0.01 | 0.16         | 0.59             | -0.3  | 0.19         | 0.29             | 0.56    | 0.38         |
| <i>CRTISO</i> | Inner             | 0.47     | 0.39             | 0.46                      | -0.32        | -0.41 | -0.56        | -0.63        | -0.81 | -<br>0.88    | 0.7              | 0.82* | 0.79*        | -0.93**          | -0.92** | -0.86*       |

|               |       |         |       |       |         |       |       |       |       |           |       |       |        |       |        |       |
|---------------|-------|---------|-------|-------|---------|-------|-------|-------|-------|-----------|-------|-------|--------|-------|--------|-------|
|               | Outer | -0.13   | 0.45  | 0.14  | -0.75   | -0.38 | -0.7  | -0.15 | -0.48 | -<br>0.21 | 0.81* | 0.76* | 0.76*  | -0.35 | -0.76* | -0.37 |
| <i>LCY-β1</i> | Inner | 0.42    | 0.39  | 0.26  | 0.32    | 0.26  | 0.13  | -0.16 | 0.04  | -<br>0.24 | 0.36  | 0.35  | 0.03   | 0.01  | 0.21   | 0.08  |
|               | Outer | 0.98*** | 0.53  | 0.77* | 0.96*** | 0.46  | 0.76* | 0.39  | 0.45  | 0.54      | 0.53  | 0.36  | 0.27   | 0.56  | 0.62   | 0.80* |
| <i>LCY-β2</i> | Inner | 0.73    | 0.7   | 0.65  | -0.42   | -0.44 | -0.72 | -0.58 | -0.8  | -<br>0.93 | 0.77* | 0.85* | 0.91** | 0.03  | -0.23  | -0.11 |
|               | Outer | -0.16   | 0.52  | -0.03 | -0.25   | -0.41 | -0.46 | -0.39 | -0.76 | -<br>0.66 | 0.55  | 0.63  | 0.5    | 0.24  | 0.08   | 0.31  |
| <i>LCY-ε</i>  | Inner | 0.72    | 0.54  | 0.39  | 0.4     | 0.01  | 0.19  | -0.67 | -0.45 | -<br>0.69 | -0.42 | -0.12 | -0.42  | -0.31 | -0.73  | -0.69 |
|               | Outer | -0.05   | 0.42  | -0.09 | -0.08   | 0.08  | -0.02 | -0.4  | -0.16 | -0.2      | 0.37  | 0.2   | 0.41   | -0.39 | -0.56  | -0.49 |
| <i>CHY</i>    | Inner | -0.1    | -0.32 | -0.37 | 0.23    | -0.12 | 0.21  | -0.15 | -0.37 | -<br>0.62 | -0.31 | -0.21 | -0.51  | 0.29  | 0.08   | 0.12  |
|               | Outer | 0.66    | -0.2  | 0.26  | -0.09   | -0.45 | -0.36 | 0.01  | 0.45  | 0.3       | 0.18  | -0.14 | -0.05  | -0.36 | 0.15   | -0.17 |
| <i>CHY-β</i>  | Inner | 0.68    | 0.23  | 0.08  | 0.31    | 0.01  | -0.16 | -0.75 | -0.71 | -<br>0.78 | -0.22 | 0.07  | -0.28  | -0.36 | -0.47  | -0.28 |
|               | Outer | 0.22    | 0.16  | -0.1  | 0.75    | 0.18  | 0.39  | -0.27 | -0.72 | -<br>0.47 | 0.41  | 0.29  | 0.39   | -0.12 | -0.2   | 0.08  |
| <i>VDE</i>    | Inner | 0.51    | 0.11  | 0.17  | 0.27    | -0.27 | -0.09 | -0.79 | -0.57 | -<br>0.81 | 0.08  | 0.49  | 0.56   | -0.2  | -0.41  | -0.55 |
|               | Outer | -0.2    | 0.11  | -0.19 | 0.05    | -0.15 | -0.07 | -0.22 | -0.36 | -<br>0.21 | 0.59  | 0.63  | 0.86*  | 0.35  | -0.03  | 0.25  |
| <i>ZEP</i>    | Inner | 0.56    | 0.42  | 0.58  | 0.54    | 0.12  | 0.19  | 0.09  | 0.28  | 0         | -0.02 | 0.11  | -0.16  | -0.16 | -0.48  | -0.26 |
|               | Outer | 0.42    | 0.55  | 0.57  | 0.7     | 0.27  | 0.49  | 0.66  | 0.63  | 0.74      | 0.67  | 0.25  | 0.46   | -0.08 | -0.26  | -0.03 |

<sup>1</sup> Commercial size; <sup>2</sup> Lutein; <sup>3</sup> β-carotene; \* Significant ( $P < 0.05$ ); \*\* Significant ( $P < 0.01$ ); \*\*\* Significant ( $P < 0.001$ ).

**Supplementary Table S4.** An expression correlation analysis using *LsLCY-β1* & *LCY-β2* as the driver genes for β-carotene biosynthesis with all other carotenoid biosynthesis pathway genes.

| Control Variables | Gene   | DXS     | DXR     | IPI     | GGPS    | GGPPS  | PSY1    | PSY2    | PDS     | ZDS     | CRTISO  | LCY-ε   | CHYε    | CHYβ    | VDE     | ZEP     |
|-------------------|--------|---------|---------|---------|---------|--------|---------|---------|---------|---------|---------|---------|---------|---------|---------|---------|
| LCY-β1 & LCY-β2   | DXS    | 1       | -0.296  | 0.276   | 0.269   | 0.147  | 0.053   | 0.331   | 0.134   | 0.166   | 0.217   | 0.520** | -0.097  | 0.865** | 0.367   | 0.221   |
|                   | DXR    | -0.296  | 1       | -0.15   | 0.023   | -0.08  | -0.448* | 0.141   | -0.237  | -0.322  | 0.103   | -0.079  | 0.075   | -0.259  | 0.433*  | 0.37    |
|                   | IPI    | 0.276   | -0.15   | 1       | 0.307   | 0.188  | 0.419*  | 0.706** | 0.581** | 0.447*  | 0.740** | 0.113   | 0.032   | 0.136   | 0.397*  | 0.495** |
|                   | GGPS   | 0.269   | 0.023   | 0.307   | 1       | 0.248  | 0.102   | 0.708** | 0.336   | 0.104   | 0.318   | 0.570** | 0.011   | 0.508** | 0.334   | 0.166   |
|                   | GGPPS  | 0.147   | -0.08   | 0.188   | 0.248   | 1      | 0.422*  | 0.077   | 0.367   | 0.269   | 0.164   | 0.169   | 0.325   | 0.081   | -0.085  | 0.071   |
|                   | PSY1   | 0.053   | -0.448* | 0.419*  | 0.102   | 0.422* | 1       | 0.141   | 0.774** | 0.773** | 0.167   | 0.048   | 0.587** | 0.051   | -0.261  | -0.129  |
|                   | PSY2   | 0.331   | 0.141   | 0.708** | 0.708** | 0.077  | 0.141   | 1       | 0.451*  | 0.181   | 0.686** | 0.381*  | -0.104  | 0.460*  | 0.563** | 0.385*  |
|                   | PDS    | 0.134   | -0.237  | 0.581** | 0.336   | 0.367  | 0.774** | 0.451*  | 1       | 0.794** | 0.445*  | 0.284   | 0.549** | 0.174   | 0.092   | 0.141   |
|                   | ZDS    | 0.166   | -0.322  | 0.447*  | 0.104   | 0.269  | 0.773** | 0.181   | 0.794** | 1       | 0.189   | 0.062   | 0.601** | 0.146   | -0.039  | 0.025   |
|                   | CRTISO | 0.217   | 0.103   | 0.740** | 0.318   | 0.164  | 0.167   | 0.666** | 0.445*  | 0.189   | 1       | 0.382*  | -0.153  | 0.103   | 0.607** | 0.794** |
|                   | LCY-ε  | 0.520** | -0.079  | 0.113   | 0.570** | 0.169  | 0.048   | 0.381*  | 0.284   | 0.062   | 0.382*  | 1       | 0.02    | 0.532** | 0.306   | 0.312   |
|                   | CHYε   | -0.097  | 0.075   | 0.032   | 0.011   | 0.325  | 0.587** | -0.104  | 0.549** | 0.601** | -0.153  | 0.02    | 1       | -0.081  | -0.12   | -0.043  |
|                   | CHYβ   | 0.865** | -0.259  | 0.136   | 0.508** | 0.081  | 0.051   | 0.460*  | 0.174   | 0.146   | 0.103   | 0.532** | -0.081  | 1       | 0.316   | -0.032  |
|                   | VDE    | 0.367   | 0.433*  | 0.397*  | 0.334   | -0.085 | -0.261  | 0.563** | 0.092   | -0.039  | 0.607** | 0.306   | -0.12   | 0.316   | 1       | 0.776** |
|                   | ZEP    | 0.221   | 0.37    | 0.495** | 0.166   | 0.071  | -0.129  | 0.385*  | 0.141   | 0.025   | 0.794** | 0.312   | -0.043  | -0.032  | 0.776** | 1       |

Note. Pink colour means Pearson correlation is >0.75. \*\*. Correlation is significant at 0.01 level.

\*. Correlation is significant at 0.05 level.



**Supplementary Table S5.** An expression correlation analysis using *CHYε* as the driver gene for lutein biosynthesis to determine the level of co-expression that *CHYε* shares with all of the other carotenoid biosynthesis pathway genes.

| Control Variables | Genes  | DXS     | DXR      | IPI     | GGPS    | GGPPS  | PSY1     | PSY2    | PDS     | ZDS     | CRTISO  | LCY-β1  | LCY-β2  | LCY-ε   | CHYβ    | VDE     | ZEP     |
|-------------------|--------|---------|----------|---------|---------|--------|----------|---------|---------|---------|---------|---------|---------|---------|---------|---------|---------|
| CHYε              | DXS    | 1       | 0.169    | 0.502** | 0.440*  | -0.026 | -0.164   | 0.583** | 0.356   | 0.238   | 0.487** | 0.776** | 0.614** | 0.868** | 0.970** | 0.578** | 0.567** |
|                   | DXR    | 0.169   | 1        | -0.014  | 0.089   | -0.169 | -0.643** | 0.195   | -0.221  | -0.399* | 0.143   | 0.342   | 0.14    | 0.221   | 0.171   | 0.371*  | 0.327   |
|                   | IPI    | 0.502** | -0.014   | 1       | 0.545** | 0.188  | 0.303    | 0.811** | 0.756** | 0.587** | 0.816** | 0.2     | 0.584** | 0.544** | 0.470*  | 0.660** | 0.710** |
|                   | GGPS   | 0.440*  | 0.089    | 0.545** | 1       | 0.269  | 0.031    | 0.818** | 0.565** | 0.288   | 0.638** | 0.106   | 0.596** | 0.648** | 0.556** | 0.634** | 0.559** |
|                   | GGPPS  | -0.026  | -0.169   | 0.188   | 0.269   | 1      | 0.33     | 0.148   | 0.26    | 0.151   | 0.234   | -0.23   | 0.1     | 0.035   | -0.041  | 0.049   | 0.126   |
|                   | PSY1   | -0.164  | -0.643** | 0.303   | 0.031   | 0.33   | 1        | 0.047   | 0.518** | 0.580** | 0.105   | -0.256  | -0.116  | -0.179  | -0.162  | -0.233  | -0.172  |
|                   | PSY2   | 0.583** | 0.195    | 0.811** | 0.818** | 0.148  | 0.047    | 1       | 0.703** | 0.429*  | 0.883** | 0.192   | 0.813** | 0.757** | 0.652** | 0.837** | 0.788** |
|                   | PDS    | 0.356   | -0.221   | 0.756** | 0.565** | 0.26   | 0.518**  | 0.703** | 1       | 0.731** | 0.715** | 0.072   | 0.481** | 0.487** | 0.394*  | 0.480** | 0.489** |
|                   | ZDS    | 0.238   | -0.399*  | 0.587** | 0.288   | 0.151  | 0.580**  | 0.429*  | 0.731** | 1       | 0.464*  | -0.042  | 0.321   | 0.237   | 0.243   | 0.275   | 0.292   |
|                   | CRTISO | 0.487** | 0.143    | 0.816** | 0.638** | 0.234  | 0.105    | 0.883** | 0.715** | 0.464*  | 1       | 0.092   | 0.819** | 0.716** | 0.494** | 0.850** | 0.924** |
|                   | LCY-β1 | 0.776** | 0.342    | 0.2     | 0.106   | -0.23  | -0.256   | 0.192   | 0.072   | -0.042  | 0.092   | 1       | 0.238   | 0.604** | 0.738** | 0.183   | 0.212   |
|                   | LCY-β2 | 0.614** | 0.14     | 0.584** | 0.596** | 0.1    | -0.116   | 0.813** | 0.481** | 0.321   | 0.819** | 0.238   | 1       | 0.829** | 0.651** | 0.779** | 0.808** |
|                   | LCY-ε  | 0.868** | 0.221    | 0.544** | 0.648** | 0.035  | -0.179   | 0.757** | 0.487** | 0.237   | 0.716** | 0.604** | 0.829** | 1       | 0.883** | 0.717** | 0.747** |
|                   | CHYβ   | 0.970** | 0.171    | 0.470*  | 0.556** | -0.041 | -0.162   | 0.652** | 0.394*  | 0.243   | 0.494** | 0.738** | 0.651** | 0.883** | 1       | 0.596** | 0.528** |
|                   | VDE    | 0.578** | 0.371*   | 0.660** | 0.634** | 0.049  | -0.233   | 0.837** | 0.480** | 0.275   | 0.850** | 0.183   | 0.779** | 0.717** | 0.596** | 1       | 0.901** |
|                   | ZEP    | 0.567** | 0.327    | 0.710** | 0.559** | 0.126  | -0.172   | 0.788** | 0.489** | 0.292   | 0.924** | 0.212   | 0.808** | 0.747** | 0.528** | 0.901** | 1       |

Note: Pink colour means Pearson correlation is >0.75. \*\*. Correlation is significant at 0.01 level.

\*. Correlation is significant at 0.05 level.

**Supplementary Table S6.** Lettuce plants used in the experiments.

| <b>Genotype</b> | <b>Type</b>  | <b>Genotype origin</b> | <b>Seeds origin</b> |
|-----------------|--------------|------------------------|---------------------|
| DarkLand        | Romaine      | USA                    | UFLA Germplasm Bank |
| Dragoon         | Mini Romaine | USA                    | UFLA Germplasm Bank |
| Grand Rapids    | Loose leaf   | USA                    | UFLA Germplasm Bank |
| Parris Island   | Romaine      | USA                    | UFLA Germplasm Bank |
| Salinas 88      | Crisp Head   | USA                    | UFLA Germplasm Bank |
| Verônica        | Loose Leaf   | Brazil                 | UFLA Germplasm Bank |

## Supplementary Figures

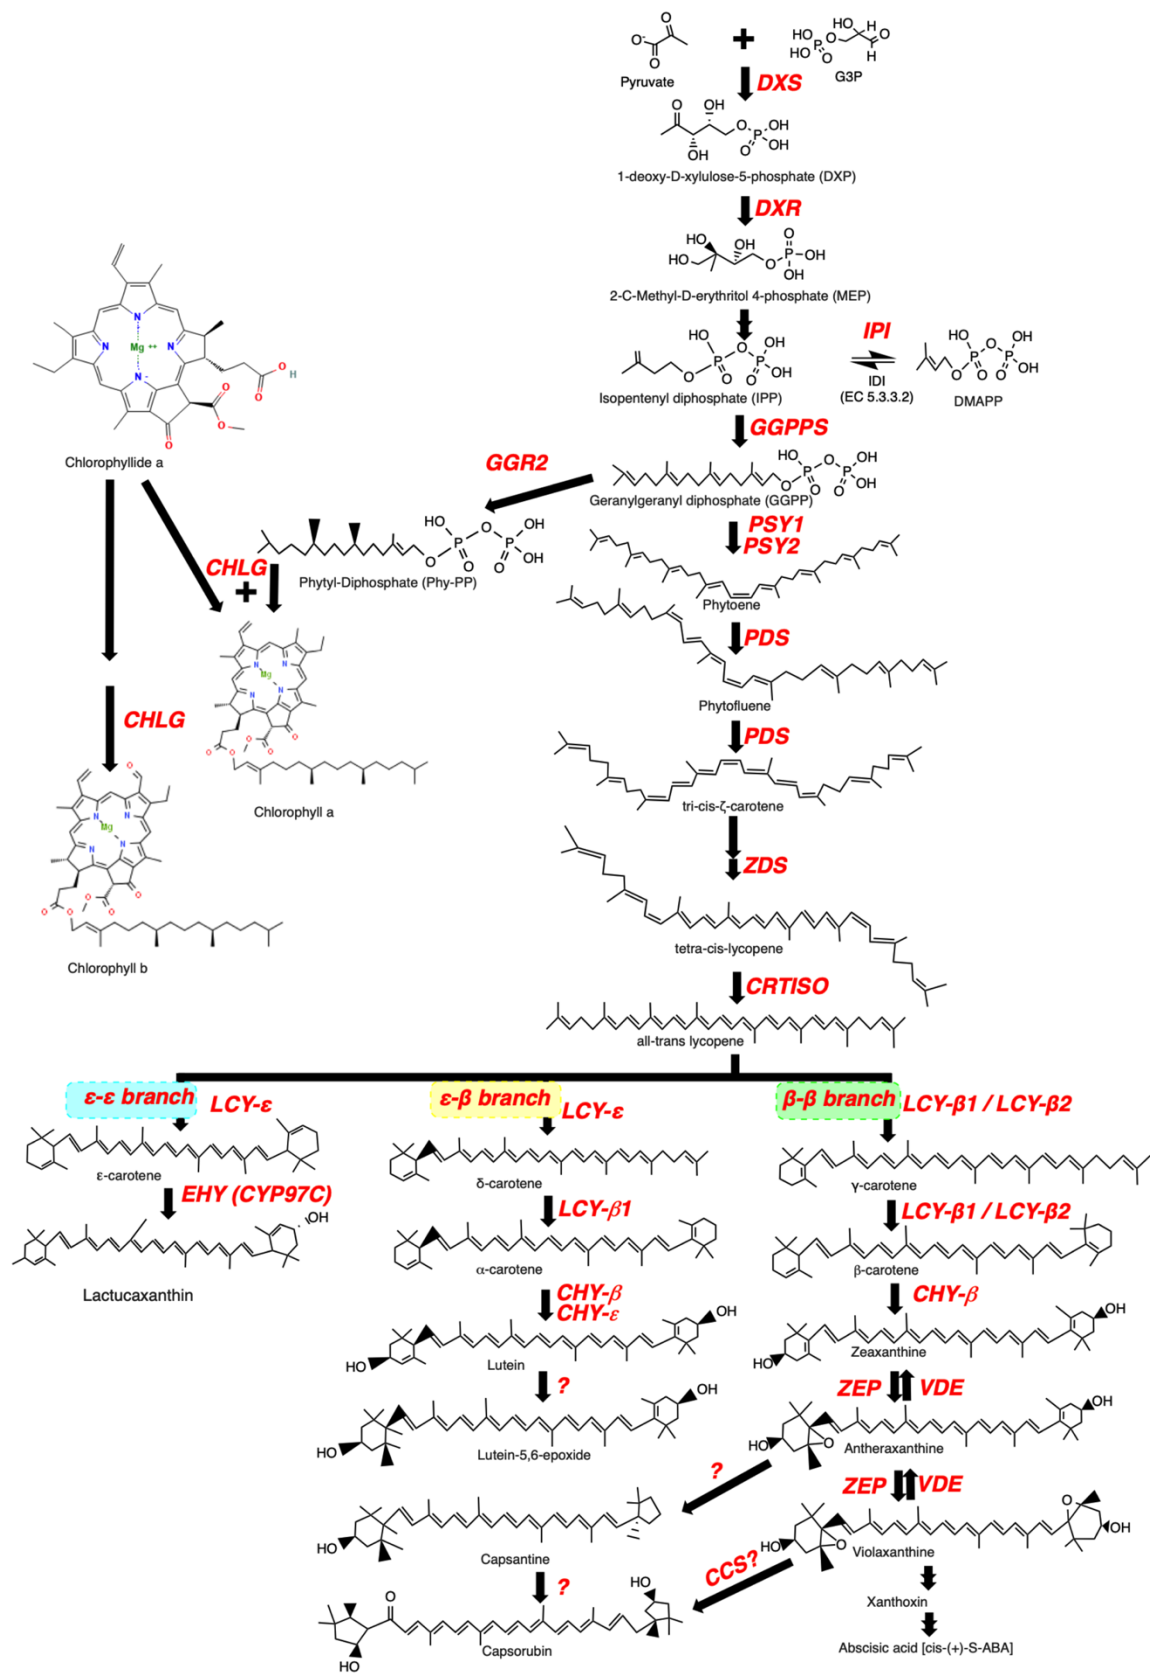

**Supplementary Figure S1.** Schematic representation of the non-mevalonate (methylerythritol 4-phosphate, MEP) chloroplasts pathway and mevalonate (cytosolic) pathway of carotenoid biosynthesis in *Lactuca sativa*, *Asteraceae*. The enzymes' names are highlighted in bold. Abbreviations: GA3P, glyceraldehyde-3-phosphate; DXS, 1-deoxyxylulose 5-phosphate synthase; DOXP, D-1-deoxyxylulose-5-phosphate; DXR, 1-deoxyxylulose 5-phosphate reductoisomerase; MEP, 2-C-methyl-D-erythritol-2,4- cyclodiphosphate; IPP, isopentenyl diphosphate; IPI, IPP isomerase; GGPP, geranylgeranyl diphosphate; GGPS, GGPP synthase; PSY1, phytoene synthase; PDS, phytoene desaturase; ZDS,  $\zeta$ -carotene desaturase; CRTISO, carotenoid isomerase; LCY-B, lycopene  $\beta$ -cyclase; LCY-E, lycopene  $\epsilon$ -cyclase; CHYB,  $\beta$ -ring hydroxylase; CHYE,  $\epsilon$ -ring hydroxylase; ZEP, zeaxanthin epoxidase; VDE, violaxanthin deepoxidase; EHY,  $\epsilon$ -carotene hydroxylase; CHLG, Chlorophyll synthase; GGR2, geranylgeranyl reductase2.

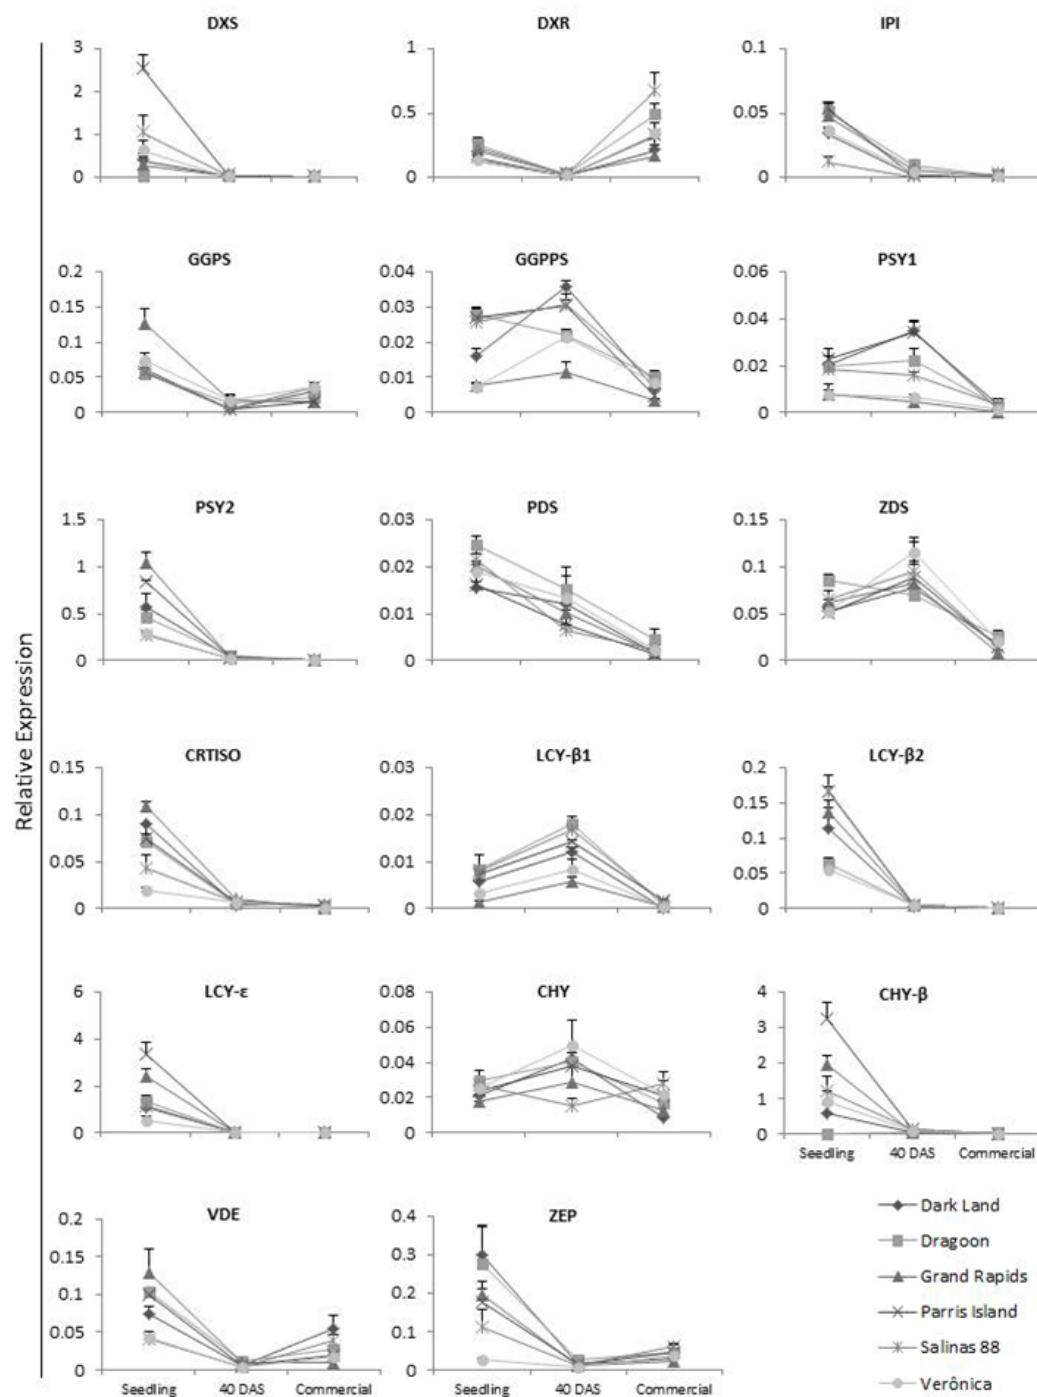

**Supplementary Figure S2.** Relative expression of lettuce carotenoid biosynthetic genes in inner leaves of different lettuce cultivar measured at seedling stage, 40 days after sowing (DAS), and commercial size (60 DAS) stages. Gene expression was measured relative to *UBIQUITIN*. Error bars are standard deviation of the mean from three biological replicates.

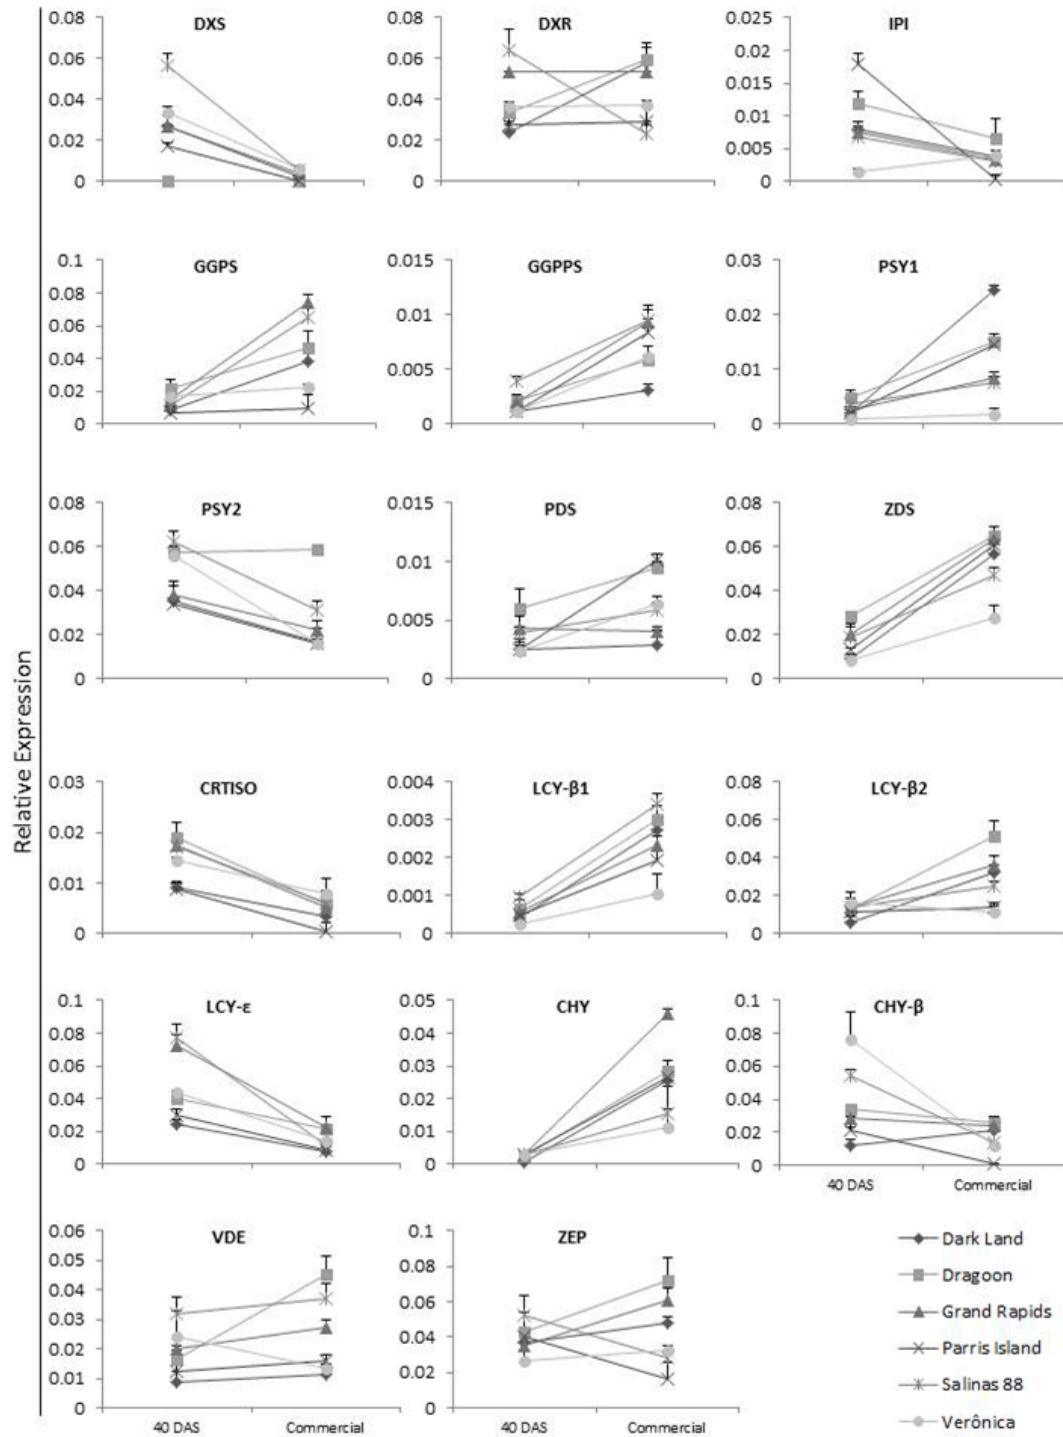

**Supplementary Figure S3.** Relative expression of lettuce carotenoid biosynthetic genes in outer leaves of different lettuce cultivar measured at 40 days after sowing (DAS) and commercial size (60 DAS) stages. Gene expression was measured relative to *UBIQUITIN*. Error bars are standard deviation of the mean from three biological replicates.

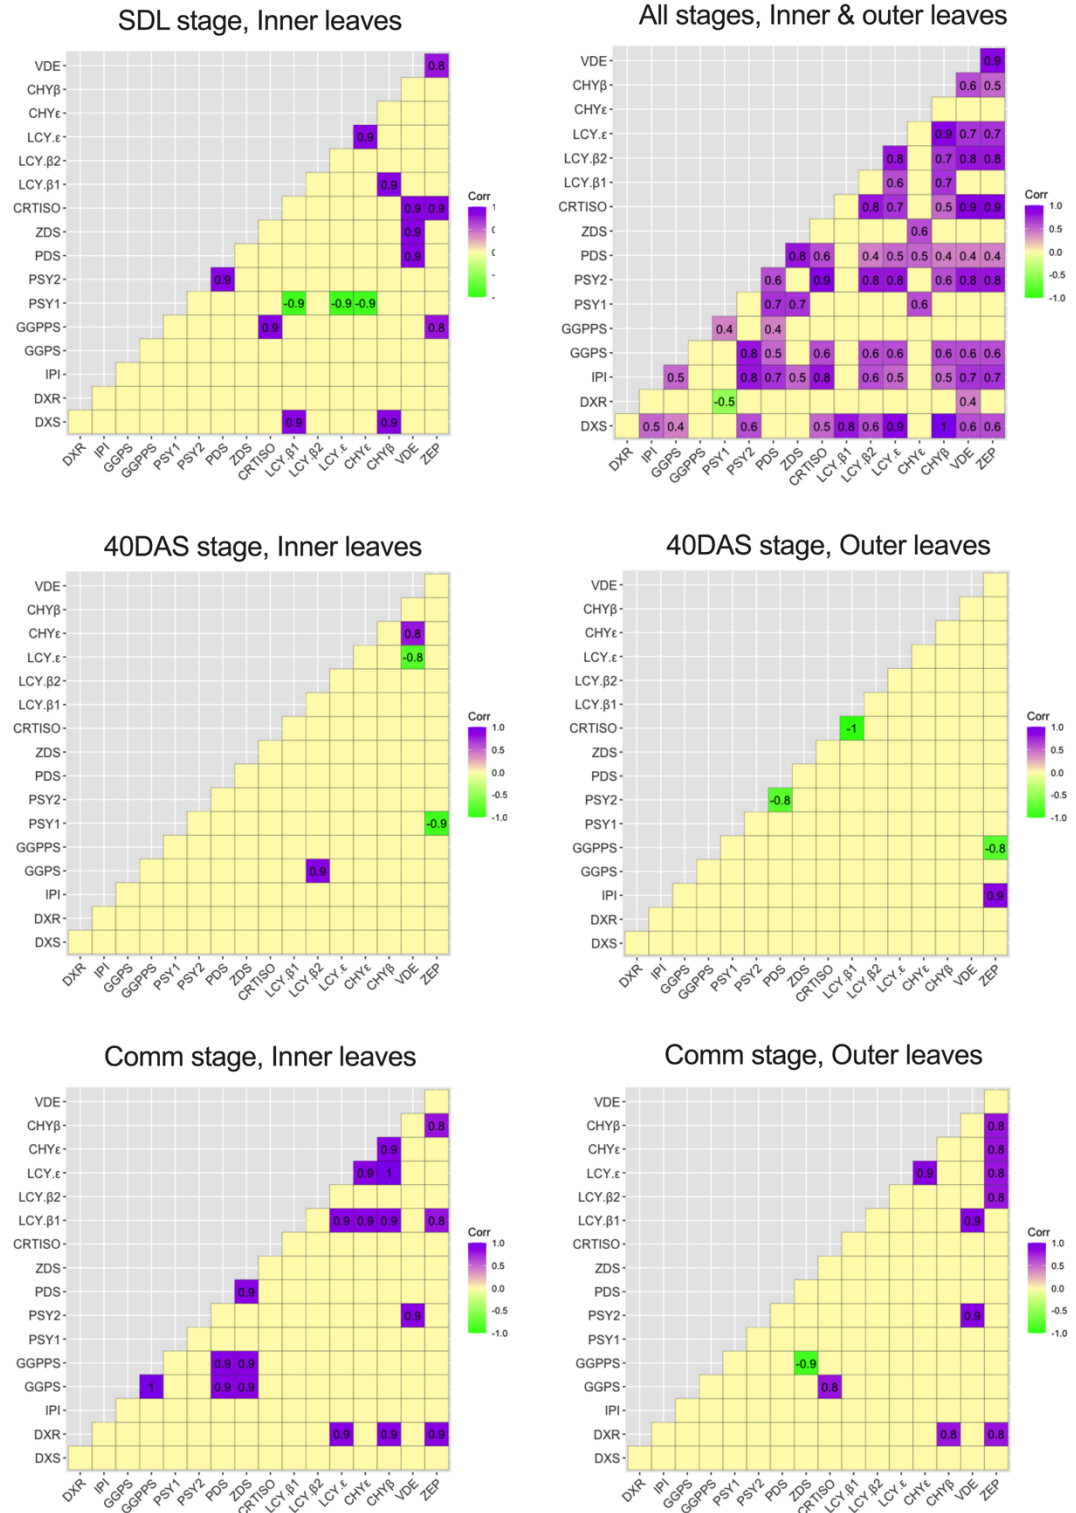

**Supplementary Figure S4.** Pearson correlation analysis of Relative expression of lettuce carotenoid biosynthetic genes in outer leaves of different lettuce cultivar measured 20days after sowing (SDL), at 40days after sowing (DAS) and commercial size (60DAS) stages. Only significant correlation is presented with Pearson correlation results. Correlation is significant at 0.05 level.



### A Carotenoids standards

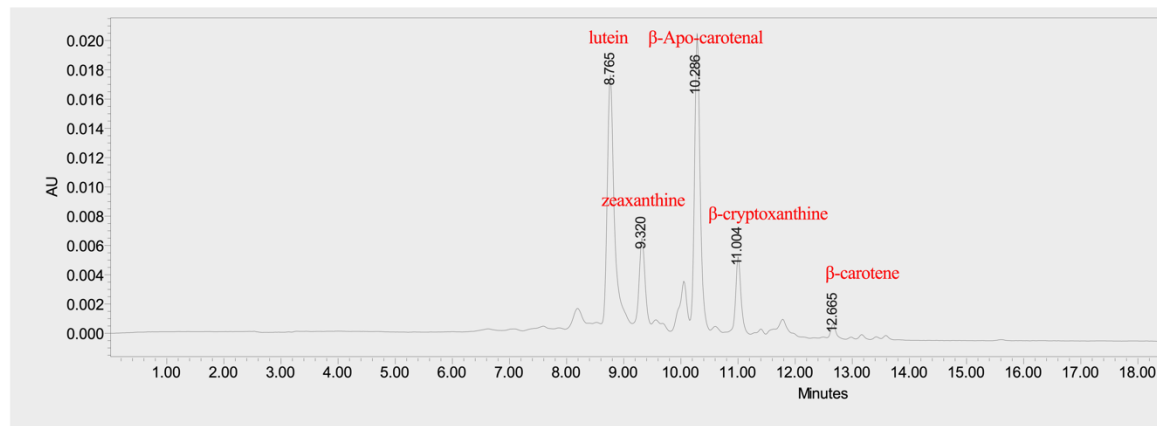

### B Plant Extract

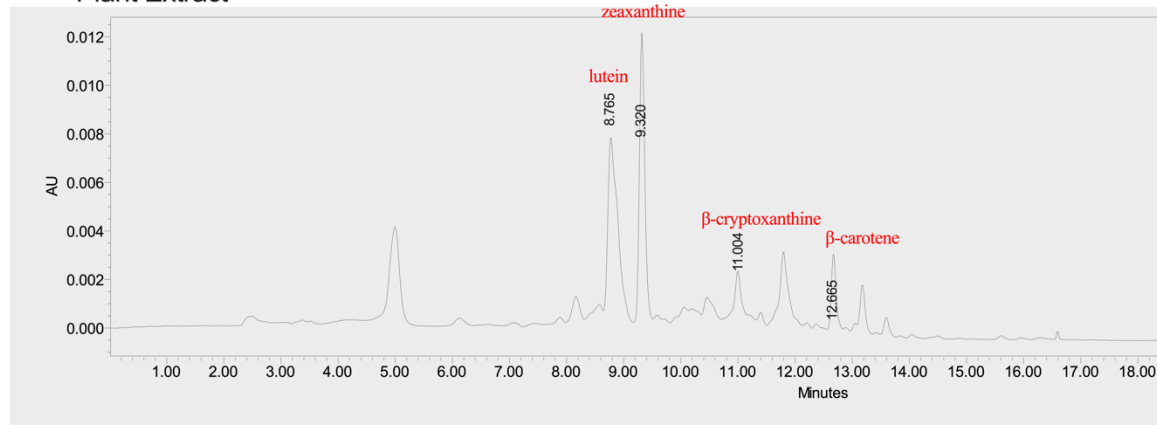

### C Plant Extract spiked with Carotenoids standards

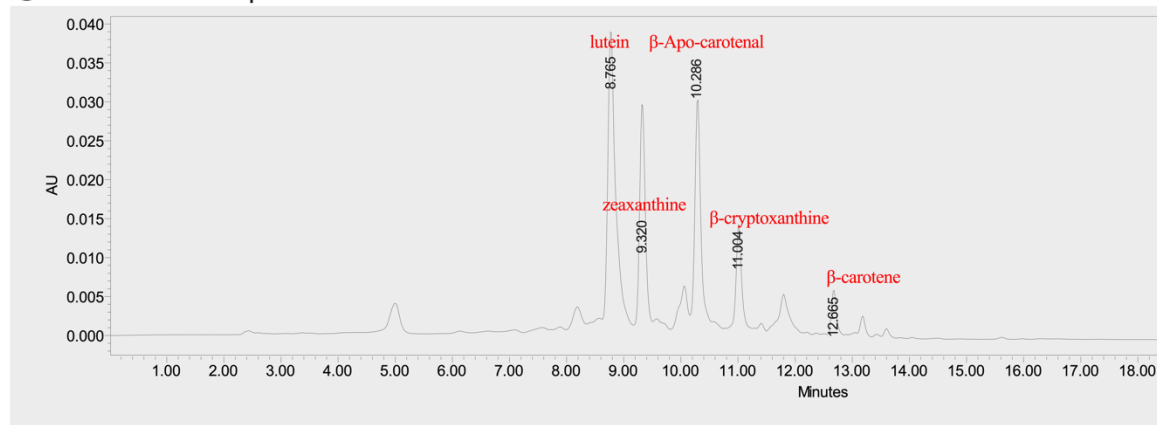

**Supplementary Figure S5.** Carotenoids HPLC profile. A. Standards used to analyse carotenoids content in leaves. B. Plant extracts carotenoid profile. C. Plant extract spiked with carotenoids standards.
